# Supplementary material for: Synthesis of Ibuprofen Monoglyceride Using Novozym®435: Biocatalyst Activation and Stabilization in Multiphasic Systems
Source: MDPI journal article supplement (doi:10.3390/catal12121531), 2022-11-28
Supplement: s1 [file s1]

## Supplementary Material

*Paper: Synthesis of ibuprofen monoglyceride using Novozym®435: biocatalyst activation and stabilization in multiphasic systems*

Data of kinetic runs in the L-L-S triphasic system glycerol-(toluene+ibuprofen)-Novozym®435

**Table S1.** Kinetic runs performed for the anhydrous triphasic system

| Run   | C <sub>w</sub> (% v/v) | T (°C) | C <sub>I0</sub> (g·L <sup>-1</sup> ) |
|-------|------------------------|--------|--------------------------------------|
| S4E1  | 0                      | 50     | 20                                   |
| S4E2  | 0                      | 50     | 60                                   |
| S4E3  | 0                      | 50     | 100                                  |
| S4E4  | 0                      | 60     | 20                                   |
| S4E5  | 0                      | 60     | 60                                   |
| S4E6  | 0                      | 60     | 100                                  |
| S4E7  | 0                      | 70     | 20                                   |
| S4E8  | 0                      | 70     | 60                                   |
| S4E9  | 0                      | 70     | 100                                  |
| S4E10 | 0                      | 80     | 20                                   |
| S4E11 | 0                      | 80     | 60                                   |
| S4E12 | 0                      | 80     | 100                                  |

**Table S2.** Experimental results of the enzymatic esterification of glycerin with ibuprofen immobilized enzyme N435 at T=50 °C for the anhydrous system.

|                   | <b>S4E1</b><br><b>C<sub>I0</sub>= 20 g·L<sup>-1</sup>T=50 °C</b> |                                            | <b>S4E2</b><br><b>C<sub>I0</sub>= 60 g·L<sup>-1</sup>T=50 °C</b> |                                            | <b>S4E3</b><br><b>C<sub>I0</sub>= 100 g·L<sup>-1</sup>T=50 °C</b> |                                            |
|-------------------|------------------------------------------------------------------|--------------------------------------------|------------------------------------------------------------------|--------------------------------------------|-------------------------------------------------------------------|--------------------------------------------|
| <b>Time (min)</b> | <b>X<sub>MG</sub></b>                                            | <b>C<sub>MG</sub> (mol L<sup>-1</sup>)</b> | <b>X<sub>MG</sub></b>                                            | <b>C<sub>MG</sub> (mol L<sup>-1</sup>)</b> | <b>X<sub>MG</sub></b>                                             | <b>C<sub>MG</sub> (mol L<sup>-1</sup>)</b> |
| 0                 | 0.000                                                            | 0.000                                      | 0.000                                                            | 0.000                                      | 0.000                                                             | 0.000                                      |
| 10                | 0.080                                                            | 0.008                                      | 0.030                                                            | 0.009                                      | 0.020                                                             | 0.010                                      |
| 20                | 0.140                                                            | 0.013                                      | 0.050                                                            | 0.014                                      | 0.030                                                             | 0.014                                      |
| 30                | 0.190                                                            | 0.018                                      | 0.080                                                            | 0.023                                      | 0.050                                                             | 0.024                                      |
| 40                | 0.231                                                            | 0.022                                      | 0.110                                                            | 0.032                                      | 0.070                                                             | 0.034                                      |
| 60                | 0.312                                                            | 0.030                                      | 0.160                                                            | 0.046                                      | 0.090                                                             | 0.043                                      |
| 90                | 0.412                                                            | 0.040                                      | 0.220                                                            | 0.063                                      | 0.150                                                             | 0.072                                      |
| 120               | 0.489                                                            | 0.047                                      | 0.270                                                            | 0.078                                      | 0.190                                                             | 0.091                                      |
| 150               | 0.531                                                            | 0.051                                      | 0.320                                                            | 0.092                                      | 0.240                                                             | 0.115                                      |
| 180               | 0.584                                                            | 0.056                                      | 0.380                                                            | 0.109                                      | 0.270                                                             | 0.130                                      |
| 240               | 0.662                                                            | 0.064                                      | 0.450                                                            | 0.130                                      | 0.320                                                             | 0.154                                      |
| 300               | 0.741                                                            | 0.071                                      | 0.520                                                            | 0.150                                      | 0.380                                                             | 0.182                                      |
| 360               | 0.775                                                            | 0.074                                      | 0.560                                                            | 0.161                                      | 0.410                                                             | 0.197                                      |
| 400               | 0.794                                                            | 0.076                                      | 0.590                                                            | 0.170                                      | 0.430                                                             | 0.206                                      |
| 500               | 0.845                                                            | 0.081                                      | 0.620                                                            | 0.179                                      | 0.470                                                             | 0.226                                      |
| 600               | 0.874                                                            | 0.084                                      | 0.660                                                            | 0.190                                      | 0.510                                                             | 0.245                                      |
| 700               | 0.889                                                            | 0.085                                      | 0.690                                                            | 0.199                                      | 0.550                                                             | 0.264                                      |
| 800               | 0.905                                                            | 0.087                                      | 0.720                                                            | 0.207                                      | 0.580                                                             | 0.278                                      |
| 900               | 0.924                                                            | 0.089                                      | 0.740                                                            | 0.213                                      | 0.610                                                             | 0.293                                      |
| 1000              | 0.931                                                            | 0.089                                      | 0.750                                                            | 0.216                                      | 0.630                                                             | 0.302                                      |
| 1100              | 0.934                                                            | 0.090                                      | 0.770                                                            | 0.222                                      | 0.650                                                             | 0.312                                      |
| 1200              | 0.934                                                            | 0.090                                      | 0.790                                                            | 0.228                                      | 0.680                                                             | 0.326                                      |
| 1300              | 0.938                                                            | 0.090                                      | 0.810                                                            | 0.233                                      | 0.700                                                             | 0.336                                      |
| 1400              | 0.941                                                            | 0.090                                      | 0.820                                                            | 0.236                                      | 0.720                                                             | 0.346                                      |
| 1500              | 0.942                                                            | 0.090                                      | 0.830                                                            | 0.239                                      | 0.735                                                             | 0.353                                      |

**Table S3.** Experimental results of the enzymatic esterification of glycerin with ibuprofen immobilized enzyme N435 at T=60 °C for the anhydrous system.

|                   | <b>S4E4</b><br><b>C<sub>I0</sub>= 20 g·L<sup>-1</sup>T=60 °C</b> |                                            | <b>S4E5</b><br><b>C<sub>I0</sub>= 60 g·L<sup>-1</sup>T=60 °C</b> |                                            | <b>S4E6</b><br><b>C<sub>I0</sub>= 100 g·L<sup>-1</sup>T=60 °C</b> |                                            |
|-------------------|------------------------------------------------------------------|--------------------------------------------|------------------------------------------------------------------|--------------------------------------------|-------------------------------------------------------------------|--------------------------------------------|
| <b>Time (min)</b> | <b>X<sub>MG</sub></b>                                            | <b>C<sub>MG</sub> (mol L<sup>-1</sup>)</b> | <b>X<sub>MG</sub></b>                                            | <b>C<sub>MG</sub> (mol L<sup>-1</sup>)</b> | <b>X<sub>MG</sub></b>                                             | <b>C<sub>MG</sub> (mol L<sup>-1</sup>)</b> |
| 0                 | 0.000                                                            | 0.000                                      | 0.000                                                            | 0.000                                      | 0.000                                                             | 0.000                                      |
| 10                | 0.110                                                            | 0.011                                      | 0.048                                                            | 0.014                                      | 0.035                                                             | 0.017                                      |
| 20                | 0.183                                                            | 0.018                                      | 0.099                                                            | 0.029                                      | 0.061                                                             | 0.029                                      |
| 30                | 0.257                                                            | 0.025                                      | 0.153                                                            | 0.044                                      | 0.099                                                             | 0.048                                      |
| 40                | 0.301                                                            | 0.029                                      | 0.205                                                            | 0.059                                      | 0.125                                                             | 0.060                                      |
| 60                | 0.401                                                            | 0.039                                      | 0.280                                                            | 0.081                                      | 0.179                                                             | 0.086                                      |
| 90                | 0.502                                                            | 0.048                                      | 0.378                                                            | 0.109                                      | 0.231                                                             | 0.111                                      |
| 120               | 0.584                                                            | 0.056                                      | 0.455                                                            | 0.131                                      | 0.290                                                             | 0.139                                      |
| 150               | 0.651                                                            | 0.063                                      | 0.491                                                            | 0.141                                      | 0.336                                                             | 0.161                                      |
| 180               | 0.704                                                            | 0.068                                      | 0.532                                                            | 0.153                                      | 0.367                                                             | 0.176                                      |
| 240               | 0.754                                                            | 0.072                                      | 0.591                                                            | 0.170                                      | 0.410                                                             | 0.197                                      |
| 300               | 0.808                                                            | 0.078                                      | 0.631                                                            | 0.182                                      | 0.445                                                             | 0.214                                      |
| 360               | 0.841                                                            | 0.081                                      | 0.671                                                            | 0.193                                      | 0.503                                                             | 0.242                                      |
| 400               | 0.867                                                            | 0.083                                      | 0.692                                                            | 0.199                                      | 0.530                                                             | 0.254                                      |
| 500               | 0.912                                                            | 0.088                                      | 0.735                                                            | 0.212                                      | 0.586                                                             | 0.281                                      |
| 600               | 0.927                                                            | 0.089                                      | 0.766                                                            | 0.221                                      | 0.630                                                             | 0.302                                      |
| 700               | 0.934                                                            | 0.090                                      | 0.790                                                            | 0.228                                      | 0.665                                                             | 0.319                                      |
| 800               | 0.941                                                            | 0.090                                      | 0.809                                                            | 0.233                                      | 0.695                                                             | 0.334                                      |
| 900               | 0.943                                                            | 0.091                                      | 0.825                                                            | 0.238                                      | 0.720                                                             | 0.346                                      |
| 1000              | 0.948                                                            | 0.091                                      | 0.838                                                            | 0.241                                      | 0.741                                                             | 0.356                                      |
| 1100              | 0.951                                                            | 0.091                                      | 0.848                                                            | 0.244                                      | 0.759                                                             | 0.364                                      |
| 1200              | 0.952                                                            | 0.091                                      | 0.858                                                            | 0.247                                      | 0.775                                                             | 0.372                                      |
| 1300              | 0.953                                                            | 0.092                                      | 0.866                                                            | 0.249                                      | 0.789                                                             | 0.379                                      |
| 1400              | 0.954                                                            | 0.092                                      | 0.872                                                            | 0.251                                      | 0.802                                                             | 0.385                                      |
| 1500              | 0.954                                                            | 0.092                                      | 0.879                                                            | 0.253                                      | 0.813                                                             | 0.390                                      |

**Table S4.** Experimental results of the enzymatic esterification of glycerin with ibuprofen immobilized enzyme N435 at T=70 °C for the anhydrous system.

|                   | <b>S4E7</b><br><b>C<sub>10</sub>= 20 g·L<sup>-1</sup>T=70 °C</b> |                                            | <b>S4E8</b><br><b>C<sub>10</sub>= 60 g·L<sup>-1</sup>T=70 °C</b> |                                            | <b>S4E9</b><br><b>C<sub>10</sub>= 100 g·L<sup>-1</sup>T=70 °C</b> |                                            |
|-------------------|------------------------------------------------------------------|--------------------------------------------|------------------------------------------------------------------|--------------------------------------------|-------------------------------------------------------------------|--------------------------------------------|
| <b>Time (min)</b> | <b>X<sub>MG</sub></b>                                            | <b>C<sub>MG</sub> (mol L<sup>-1</sup>)</b> | <b>X<sub>MG</sub></b>                                            | <b>C<sub>MG</sub> (mol L<sup>-1</sup>)</b> | <b>X<sub>MG</sub></b>                                             | <b>C<sub>MG</sub> (mol L<sup>-1</sup>)</b> |
| 0                 | 0.000                                                            | 0.000                                      | 0.000                                                            | 0.000                                      | 0.000                                                             | 0.000                                      |
| 10                | 0.111                                                            | 0.011                                      | 0.068                                                            | 0.020                                      | 0.033                                                             | 0.016                                      |
| 20                | 0.208                                                            | 0.020                                      | 0.127                                                            | 0.037                                      | 0.063                                                             | 0.030                                      |
| 30                | 0.293                                                            | 0.028                                      | 0.179                                                            | 0.052                                      | 0.092                                                             | 0.044                                      |
| 40                | 0.365                                                            | 0.035                                      | 0.225                                                            | 0.065                                      | 0.119                                                             | 0.057                                      |
| 60                | 0.488                                                            | 0.047                                      | 0.303                                                            | 0.087                                      | 0.169                                                             | 0.081                                      |
| 90                | 0.602                                                            | 0.058                                      | 0.394                                                            | 0.114                                      | 0.234                                                             | 0.112                                      |
| 120               | 0.673                                                            | 0.065                                      | 0.464                                                            | 0.134                                      | 0.289                                                             | 0.139                                      |
| 150               | 0.742                                                            | 0.071                                      | 0.519                                                            | 0.150                                      | 0.338                                                             | 0.162                                      |
| 180               | 0.785                                                            | 0.075                                      | 0.563                                                            | 0.162                                      | 0.380                                                             | 0.182                                      |
| 240               | 0.867                                                            | 0.083                                      | 0.631                                                            | 0.182                                      | 0.450                                                             | 0.216                                      |
| 300               | 0.912                                                            | 0.088                                      | 0.679                                                            | 0.196                                      | 0.506                                                             | 0.243                                      |
| 360               | 0.944                                                            | 0.091                                      | 0.717                                                            | 0.207                                      | 0.553                                                             | 0.266                                      |
| 400               | 0.951                                                            | 0.091                                      | 0.737                                                            | 0.212                                      | 0.579                                                             | 0.278                                      |
| 500               | 0.954                                                            | 0.092                                      | 0.776                                                            | 0.224                                      | 0.633                                                             | 0.304                                      |
| 600               | 0.955                                                            | 0.092                                      | 0.804                                                            | 0.232                                      | 0.675                                                             | 0.324                                      |
| 700               | 0.956                                                            | 0.092                                      | 0.826                                                            | 0.238                                      | 0.709                                                             | 0.340                                      |
| 800               | 0.957                                                            | 0.092                                      | 0.843                                                            | 0.243                                      | 0.737                                                             | 0.354                                      |
| 900               | 0.958                                                            | 0.092                                      | 0.857                                                            | 0.247                                      | 0.760                                                             | 0.365                                      |
| 1000              | 0.959                                                            | 0.092                                      | 0.868                                                            | 0.250                                      | 0.779                                                             | 0.374                                      |
| 1100              | 0.960                                                            | 0.092                                      | 0.877                                                            | 0.253                                      | 0.796                                                             | 0.382                                      |
| 1200              | 0.961                                                            | 0.092                                      | 0.885                                                            | 0.255                                      | 0.810                                                             | 0.389                                      |
| 1300              | 0.962                                                            | 0.092                                      | 0.892                                                            | 0.257                                      | 0.823                                                             | 0.395                                      |
| 1400              | 0.962                                                            | 0.092                                      | 0.898                                                            | 0.259                                      | 0.834                                                             | 0.400                                      |
| 1500              | 0.964                                                            | 0.093                                      | 0.904                                                            | 0.260                                      | 0.844                                                             | 0.405                                      |

**Table S5.** Experimental results of the enzymatic esterification of glycerin with ibuprofen immobilized enzyme N435 at T=80 °C for the anhydrous system.

| Time<br>(min) | S4E10<br>C <sub>I0</sub> = 20 g·L <sup>-1</sup> T=80 °C |                                        | S4E11<br>C <sub>I0</sub> = 60 g·L <sup>-1</sup> T=80 °C |                                        | S4E12<br>C <sub>I0</sub> = 100 g·L <sup>-1</sup> T=80 °C |                                        |
|---------------|---------------------------------------------------------|----------------------------------------|---------------------------------------------------------|----------------------------------------|----------------------------------------------------------|----------------------------------------|
|               | X <sub>MG</sub>                                         | C <sub>MG</sub> (mol L <sup>-1</sup> ) | X <sub>MG</sub>                                         | C <sub>MG</sub> (mol L <sup>-1</sup> ) | X <sub>MG</sub>                                          | C <sub>MG</sub> (mol L <sup>-1</sup> ) |
| 0             | 0.000                                                   | 0.000                                  | 0.000                                                   | 0.000                                  | 0.000                                                    | 0.000                                  |
| 10            | 0.170                                                   | 0.016                                  | 0.080                                                   | 0.023                                  | 0.070                                                    | 0.034                                  |
| 20            | 0.280                                                   | 0.027                                  | 0.140                                                   | 0.040                                  | 0.130                                                    | 0.062                                  |
| 30            | 0.350                                                   | 0.034                                  | 0.200                                                   | 0.058                                  | 0.170                                                    | 0.082                                  |
| 40            | 0.410                                                   | 0.039                                  | 0.250                                                   | 0.072                                  | 0.210                                                    | 0.101                                  |
| 60            | 0.550                                                   | 0.053                                  | 0.330                                                   | 0.095                                  | 0.270                                                    | 0.130                                  |
| 90            | 0.660                                                   | 0.063                                  | 0.410                                                   | 0.118                                  | 0.330                                                    | 0.158                                  |
| 120           | 0.730                                                   | 0.070                                  | 0.480                                                   | 0.138                                  | 0.370                                                    | 0.178                                  |
| 150           | 0.790                                                   | 0.076                                  | 0.520                                                   | 0.150                                  | 0.400                                                    | 0.192                                  |
| 180           | 0.860                                                   | 0.083                                  | 0.560                                                   | 0.161                                  | 0.420                                                    | 0.202                                  |
| 240           | 0.910                                                   | 0.087                                  | 0.620                                                   | 0.179                                  | 0.450                                                    | 0.216                                  |
| 300           | 0.950                                                   | 0.091                                  | 0.650                                                   | 0.187                                  | 0.480                                                    | 0.230                                  |
| 360           | 0.960                                                   | 0.092                                  | 0.680                                                   | 0.196                                  | 0.490                                                    | 0.235                                  |
| 400           | 0.970                                                   | 0.093                                  | 0.710                                                   | 0.205                                  | 0.500                                                    | 0.240                                  |
| 500           | 0.970                                                   | 0.093                                  | 0.720                                                   | 0.207                                  | 0.510                                                    | 0.245                                  |
| 600           | 0.980                                                   | 0.094                                  | 0.750                                                   | 0.216                                  | 0.530                                                    | 0.254                                  |
| 700           | 0.980                                                   | 0.094                                  | 0.760                                                   | 0.219                                  | 0.530                                                    | 0.254                                  |
| 800           | 0.980                                                   | 0.094                                  | 0.780                                                   | 0.225                                  | 0.540                                                    | 0.259                                  |
| 900           | 0.980                                                   | 0.094                                  | 0.790                                                   | 0.228                                  | 0.550                                                    | 0.264                                  |
| 1000          | 0.980                                                   | 0.094                                  | 0.790                                                   | 0.228                                  | 0.550                                                    | 0.264                                  |
| 1100          | 0.980                                                   | 0.094                                  | 0.800                                                   | 0.230                                  | 0.550                                                    | 0.264                                  |
| 1200          | 0.980                                                   | 0.094                                  | 0.810                                                   | 0.233                                  | 0.560                                                    | 0.269                                  |
| 1300          | 0.980                                                   | 0.094                                  | 0.810                                                   | 0.233                                  | 0.560                                                    | 0.269                                  |
| 1400          | 0.980                                                   | 0.094                                  | 0.820                                                   | 0.236                                  | 0.560                                                    | 0.269                                  |
| 1500          | 0.980                                                   | 0.094                                  | 0.820                                                   | 0.236                                  | 0.560                                                    | 0.269                                  |

Data of kinetic runs in the L-L-S triphasic system (glycerol+7.4 %v/v water)-  
(toluene+ibuprofen)- Novozym®435

**Table S6.** Kinetic runs performed for the hydrated triphasic system

| Run    | C <sub>w</sub> (% v/v) | T (°C) | C <sub>10</sub> (g·L <sup>-1</sup> ) |
|--------|------------------------|--------|--------------------------------------|
| S4E13  | 7.4                    | 50     | 20                                   |
| S4E14  | 7.4                    | 50     | 60                                   |
| S4E15  | 7.4                    | 50     | 100                                  |
| S4E16  | 7.4                    | 60     | 20                                   |
| S4E17  | 7.4                    | 60     | 60                                   |
| S4E18  | 7.4                    | 60     | 100                                  |
| S4E19  | 7.4                    | 70     | 20                                   |
| S43E20 | 7.4                    | 70     | 60                                   |
| S4E21  | 7.4                    | 70     | 100                                  |
| S4E22  | 7.4                    | 80     | 20                                   |
| S4E23  | 7.4                    | 80     | 60                                   |
| S4E24  | 7.4                    | 80     | 100                                  |

**Table S7.** Experimental results of the enzymatic esterification of glycerin with ibuprofen immobilized enzyme N435 at T=50 °C for the system with added water.

|            | S4E16                                          |                                        | S4E17                                          |                                        | S4E18                                           |                                        |
|------------|------------------------------------------------|----------------------------------------|------------------------------------------------|----------------------------------------|-------------------------------------------------|----------------------------------------|
|            | C <sub>10</sub> = 20 g·L <sup>-1</sup> T=50 °C |                                        | C <sub>10</sub> = 60 g·L <sup>-1</sup> T=50 °C |                                        | C <sub>10</sub> = 100 g·L <sup>-1</sup> T=50 °C |                                        |
| Time (min) | X <sub>MG</sub>                                | C <sub>MG</sub> (mol L <sup>-1</sup> ) | X <sub>MG</sub>                                | C <sub>MG</sub> (mol L <sup>-1</sup> ) | X <sub>MG</sub>                                 | C <sub>MG</sub> (mol L <sup>-1</sup> ) |
| 0          | 0.000                                          | 0.000                                  | 0.000                                          | 0.000                                  | 0.000                                           | 0.000                                  |
| 10         | 0.085                                          | 0.008                                  | 0.047                                          | 0.014                                  | 0.035                                           | 0.017                                  |
| 20         | 0.157                                          | 0.015                                  | 0.089                                          | 0.026                                  | 0.068                                           | 0.033                                  |
| 30         | 0.217                                          | 0.021                                  | 0.129                                          | 0.038                                  | 0.099                                           | 0.048                                  |
| 40         | 0.270                                          | 0.026                                  | 0.165                                          | 0.048                                  | 0.128                                           | 0.062                                  |
| 60         | 0.355                                          | 0.034                                  | 0.229                                          | 0.067                                  | 0.180                                           | 0.087                                  |
| 90         | 0.450                                          | 0.044                                  | 0.308                                          | 0.090                                  | 0.249                                           | 0.121                                  |
| 120        | 0.520                                          | 0.050                                  | 0.374                                          | 0.109                                  | 0.308                                           | 0.149                                  |
| 150        | 0.573                                          | 0.056                                  | 0.428                                          | 0.124                                  | 0.358                                           | 0.174                                  |
| 180        | 0.615                                          | 0.060                                  | 0.474                                          | 0.138                                  | 0.402                                           | 0.195                                  |
| 240        | 0.677                                          | 0.066                                  | 0.548                                          | 0.159                                  | 0.475                                           | 0.230                                  |
| 300        | 0.721                                          | 0.070                                  | 0.605                                          | 0.176                                  | 0.533                                           | 0.258                                  |
| 360        | 0.753                                          | 0.073                                  | 0.649                                          | 0.189                                  | 0.580                                           | 0.281                                  |
| 400        | 0.770                                          | 0.075                                  | 0.674                                          | 0.196                                  | 0.607                                           | 0.294                                  |
| 500        | 0.803                                          | 0.078                                  | 0.724                                          | 0.211                                  | 0.663                                           | 0.321                                  |
| 600        | 0.827                                          | 0.080                                  | 0.761                                          | 0.221                                  | 0.705                                           | 0.342                                  |
| 700        | 0.845                                          | 0.082                                  | 0.791                                          | 0.230                                  | 0.740                                           | 0.359                                  |
| 800        | 0.859                                          | 0.083                                  | 0.814                                          | 0.237                                  | 0.767                                           | 0.372                                  |
| 900        | 0.870                                          | 0.084                                  | 0.833                                          | 0.242                                  | 0.791                                           | 0.383                                  |
| 1000       | 0.879                                          | 0.085                                  | 0.849                                          | 0.247                                  | 0.810                                           | 0.393                                  |
| 1100       | 0.887                                          | 0.086                                  | 0.863                                          | 0.251                                  | 0.827                                           | 0.401                                  |
| 1200       | 0.893                                          | 0.087                                  | 0.875                                          | 0.255                                  | 0.841                                           | 0.408                                  |
| 1300       | 0.899                                          | 0.087                                  | 0.885                                          | 0.257                                  | 0.854                                           | 0.414                                  |
| 1400       | 0.903                                          | 0.088                                  | 0.894                                          | 0.260                                  | 0.865                                           | 0.419                                  |
| 1500       | 0.907                                          | 0.088                                  | 0.901                                          | 0.262                                  | 0.875                                           | 0.424                                  |

**Table S8.** Experimental results of the enzymatic esterification of glycerin with ibuprofen immobilized enzyme N435 at T=60 °C for the system with added water.

| Time<br>(min) | S4E19<br>C <sub>I0</sub> = 20 g·L <sup>-1</sup> T=60 °C |                                        | S4E20<br>C <sub>I0</sub> = 60 g·L <sup>-1</sup> T=60 °C |                                        | S4E21<br>C <sub>I0</sub> = 100 g·L <sup>-1</sup> T=60 °C |                                        |
|---------------|---------------------------------------------------------|----------------------------------------|---------------------------------------------------------|----------------------------------------|----------------------------------------------------------|----------------------------------------|
|               | X <sub>MG</sub>                                         | C <sub>MG</sub> (mol L <sup>-1</sup> ) | X <sub>MG</sub>                                         | C <sub>MG</sub> (mol L <sup>-1</sup> ) | X <sub>MG</sub>                                          | C <sub>MG</sub> (mol L <sup>-1</sup> ) |
| 0             | 0.000                                                   | 0.000                                  | 0.000                                                   | 0.000                                  | 0.000                                                    | 0.000                                  |
| 10            | 0.103                                                   | 0.010                                  | 0.061                                                   | 0.018                                  | 0.042                                                    | 0.020                                  |
| 20            | 0.187                                                   | 0.018                                  | 0.115                                                   | 0.033                                  | 0.080                                                    | 0.039                                  |
| 30            | 0.256                                                   | 0.025                                  | 0.163                                                   | 0.047                                  | 0.115                                                    | 0.056                                  |
| 40            | 0.314                                                   | 0.030                                  | 0.207                                                   | 0.060                                  | 0.148                                                    | 0.072                                  |
| 60            | 0.406                                                   | 0.039                                  | 0.281                                                   | 0.082                                  | 0.207                                                    | 0.100                                  |
| 90            | 0.505                                                   | 0.049                                  | 0.371                                                   | 0.108                                  | 0.282                                                    | 0.137                                  |
| 120           | 0.575                                                   | 0.056                                  | 0.441                                                   | 0.128                                  | 0.345                                                    | 0.167                                  |
| 150           | 0.627                                                   | 0.061                                  | 0.497                                                   | 0.145                                  | 0.397                                                    | 0.192                                  |
| 180           | 0.667                                                   | 0.065                                  | 0.544                                                   | 0.158                                  | 0.442                                                    | 0.214                                  |
| 240           | 0.726                                                   | 0.070                                  | 0.615                                                   | 0.179                                  | 0.515                                                    | 0.250                                  |
| 300           | 0.766                                                   | 0.074                                  | 0.668                                                   | 0.194                                  | 0.572                                                    | 0.277                                  |
| 360           | 0.795                                                   | 0.077                                  | 0.709                                                   | 0.206                                  | 0.617                                                    | 0.299                                  |
| 400           | 0.811                                                   | 0.079                                  | 0.731                                                   | 0.213                                  | 0.642                                                    | 0.311                                  |
| 500           | 0.840                                                   | 0.081                                  | 0.775                                                   | 0.225                                  | 0.694                                                    | 0.336                                  |
| 600           | 0.861                                                   | 0.083                                  | 0.807                                                   | 0.235                                  | 0.733                                                    | 0.355                                  |
| 700           | 0.877                                                   | 0.085                                  | 0.831                                                   | 0.242                                  | 0.764                                                    | 0.370                                  |
| 800           | 0.889                                                   | 0.086                                  | 0.851                                                   | 0.248                                  | 0.788                                                    | 0.382                                  |
| 900           | 0.899                                                   | 0.087                                  | 0.867                                                   | 0.252                                  | 0.809                                                    | 0.392                                  |
| 1000          | 0.906                                                   | 0.088                                  | 0.880                                                   | 0.256                                  | 0.826                                                    | 0.400                                  |
| 1100          | 0.913                                                   | 0.089                                  | 0.891                                                   | 0.259                                  | 0.840                                                    | 0.407                                  |
| 1200          | 0.919                                                   | 0.089                                  | 0.900                                                   | 0.262                                  | 0.853                                                    | 0.414                                  |
| 1300          | 0.923                                                   | 0.089                                  | 0.908                                                   | 0.264                                  | 0.864                                                    | 0.419                                  |
| 1400          | 0.927                                                   | 0.090                                  | 0.915                                                   | 0.266                                  | 0.873                                                    | 0.423                                  |
| 1500          | 0.931                                                   | 0.090                                  | 0.921                                                   | 0.268                                  | 0.882                                                    | 0.428                                  |

**Table S9.** Experimental results of the enzymatic esterification of glycerin with ibuprofen immobilized enzyme N435 at T=70 °C for the system with added water.

| Time<br>(min) | S4E19<br>C <sub>I0</sub> = 20 g·L <sup>-1</sup> T=70 °C |                                        | S4E20<br>C <sub>I0</sub> = 20 g·L <sup>-1</sup> T=70 °C |                                        | S4E21<br>C <sub>I0</sub> = 20 g·L <sup>-1</sup> T=70 °C |                                        |
|---------------|---------------------------------------------------------|----------------------------------------|---------------------------------------------------------|----------------------------------------|---------------------------------------------------------|----------------------------------------|
|               | X <sub>MG</sub>                                         | C <sub>MG</sub> (mol L <sup>-1</sup> ) | X <sub>MG</sub>                                         | C <sub>MG</sub> (mol L <sup>-1</sup> ) | X <sub>MG</sub>                                         | C <sub>MG</sub> (mol L <sup>-1</sup> ) |
| 0             | 0.000                                                   | 0.000                                  | 0.000                                                   | 0.000                                  | 0.000                                                   | 0.000                                  |
| 10            | 0.140                                                   | 0.014                                  | 0.106                                                   | 0.031                                  | 0.084                                                   | 0.041                                  |
| 20            | 0.246                                                   | 0.024                                  | 0.192                                                   | 0.056                                  | 0.155                                                   | 0.075                                  |
| 30            | 0.329                                                   | 0.032                                  | 0.263                                                   | 0.076                                  | 0.217                                                   | 0.105                                  |
| 40            | 0.397                                                   | 0.038                                  | 0.323                                                   | 0.094                                  | 0.270                                                   | 0.131                                  |
| 60            | 0.499                                                   | 0.048                                  | 0.419                                                   | 0.122                                  | 0.358                                                   | 0.174                                  |
| 90            | 0.602                                                   | 0.058                                  | 0.521                                                   | 0.152                                  | 0.457                                                   | 0.222                                  |
| 120           | 0.671                                                   | 0.065                                  | 0.594                                                   | 0.173                                  | 0.531                                                   | 0.257                                  |
| 150           | 0.721                                                   | 0.070                                  | 0.649                                                   | 0.189                                  | 0.588                                                   | 0.285                                  |
| 180           | 0.759                                                   | 0.074                                  | 0.691                                                   | 0.201                                  | 0.633                                                   | 0.307                                  |
| 240           | 0.812                                                   | 0.079                                  | 0.752                                                   | 0.219                                  | 0.701                                                   | 0.340                                  |
| 300           | 0.847                                                   | 0.082                                  | 0.794                                                   | 0.231                                  | 0.748                                                   | 0.363                                  |
| 360           | 0.872                                                   | 0.085                                  | 0.825                                                   | 0.240                                  | 0.784                                                   | 0.380                                  |
| 400           | 0.886                                                   | 0.086                                  | 0.841                                                   | 0.245                                  | 0.803                                                   | 0.389                                  |
| 500           | 0.911                                                   | 0.088                                  | 0.872                                                   | 0.254                                  | 0.840                                                   | 0.407                                  |
| 600           | 0.928                                                   | 0.090                                  | 0.894                                                   | 0.260                                  | 0.867                                                   | 0.420                                  |
| 700           | 0.941                                                   | 0.091                                  | 0.911                                                   | 0.265                                  | 0.887                                                   | 0.430                                  |
| 800           | 0.951                                                   | 0.092                                  | 0.923                                                   | 0.268                                  | 0.902                                                   | 0.437                                  |
| 900           | 0.959                                                   | 0.093                                  | 0.934                                                   | 0.272                                  | 0.915                                                   | 0.444                                  |
| 1000          | 0.965                                                   | 0.094                                  | 0.942                                                   | 0.274                                  | 0.925                                                   | 0.448                                  |
| 1100          | 0.970                                                   | 0.094                                  | 0.949                                                   | 0.276                                  | 0.933                                                   | 0.452                                  |
| 1200          | 0.975                                                   | 0.095                                  | 0.955                                                   | 0.278                                  | 0.941                                                   | 0.456                                  |
| 1300          | 0.978                                                   | 0.095                                  | 0.960                                                   | 0.279                                  | 0.947                                                   | 0.459                                  |
| 1400          | 0.982                                                   | 0.095                                  | 0.964                                                   | 0.280                                  | 0.952                                                   | 0.462                                  |
| 1500          | 0.985                                                   | 0.096                                  | 0.968                                                   | 0.282                                  | 0.957                                                   | 0.464                                  |

**Table S10.** Experimental results of the enzymatic esterification of glycerin with ibuprofen immobilized enzyme N435 at T=80 °C for the system with added water.

| Time<br>(min) | S4E22<br>C <sub>I0</sub> = 20 g·L <sup>-1</sup> T=80 °C |                                        | S4E22<br>C <sub>I0</sub> = 60 g·L <sup>-1</sup> T=80 °C |                                        | S4E24<br>C <sub>I0</sub> = 100 g·L <sup>-1</sup> T=80 °C |                                        |
|---------------|---------------------------------------------------------|----------------------------------------|---------------------------------------------------------|----------------------------------------|----------------------------------------------------------|----------------------------------------|
|               | X <sub>MG</sub>                                         | C <sub>MG</sub> (mol L <sup>-1</sup> ) | X <sub>MG</sub>                                         | C <sub>MG</sub> (mol L <sup>-1</sup> ) | X <sub>MG</sub>                                          | C <sub>MG</sub> (mol L <sup>-1</sup> ) |
| 0             | 0.000                                                   | 0.000                                  | 0.000                                                   | 0.000                                  | 0.000                                                    | 0.000                                  |
| 10            | 0.283                                                   | 0.027                                  | 0.187                                                   | 0.054                                  | 0.096                                                    | 0.047                                  |
| 20            | 0.441                                                   | 0.043                                  | 0.315                                                   | 0.092                                  | 0.176                                                    | 0.085                                  |
| 30            | 0.542                                                   | 0.053                                  | 0.408                                                   | 0.119                                  | 0.243                                                    | 0.118                                  |
| 40            | 0.612                                                   | 0.059                                  | 0.479                                                   | 0.139                                  | 0.300                                                    | 0.145                                  |
| 60            | 0.703                                                   | 0.068                                  | 0.579                                                   | 0.168                                  | 0.393                                                    | 0.191                                  |
| 90            | 0.780                                                   | 0.076                                  | 0.674                                                   | 0.196                                  | 0.495                                                    | 0.240                                  |
| 120           | 0.826                                                   | 0.080                                  | 0.734                                                   | 0.213                                  | 0.569                                                    | 0.276                                  |
| 150           | 0.856                                                   | 0.083                                  | 0.775                                                   | 0.225                                  | 0.624                                                    | 0.303                                  |
| 180           | 0.877                                                   | 0.085                                  | 0.805                                                   | 0.234                                  | 0.668                                                    | 0.324                                  |
| 240           | 0.905                                                   | 0.088                                  | 0.846                                                   | 0.246                                  | 0.732                                                    | 0.355                                  |
| 300           | 0.922                                                   | 0.089                                  | 0.873                                                   | 0.254                                  | 0.777                                                    | 0.377                                  |
| 360           | 0.934                                                   | 0.091                                  | 0.892                                                   | 0.259                                  | 0.810                                                    | 0.393                                  |
| 400           | 0.943                                                   | 0.091                                  | 0.906                                                   | 0.264                                  | 0.835                                                    | 0.405                                  |
| 500           | 0.950                                                   | 0.092                                  | 0.917                                                   | 0.267                                  | 0.855                                                    | 0.414                                  |
| 600           | 0.960                                                   | 0.093                                  | 0.932                                                   | 0.271                                  | 0.885                                                    | 0.429                                  |
| 700           | 0.965                                                   | 0.094                                  | 0.942                                                   | 0.274                                  | 0.903                                                    | 0.438                                  |
| 800           | 0.970                                                   | 0.094                                  | 0.948                                                   | 0.276                                  | 0.917                                                    | 0.445                                  |
| 900           | 0.973                                                   | 0.094                                  | 0.954                                                   | 0.277                                  | 0.928                                                    | 0.450                                  |
| 1000          | 0.975                                                   | 0.095                                  | 0.958                                                   | 0.279                                  | 0.937                                                    | 0.454                                  |
| 1100          | 0.978                                                   | 0.095                                  | 0.962                                                   | 0.280                                  | 0.945                                                    | 0.458                                  |
| 1200          | 0.980                                                   | 0.095                                  | 0.965                                                   | 0.281                                  | 0.951                                                    | 0.461                                  |
| 1300          | 0.981                                                   | 0.095                                  | 0.968                                                   | 0.282                                  | 0.956                                                    | 0.463                                  |
| 1400          | 0.982                                                   | 0.095                                  | 0.970                                                   | 0.282                                  | 0.961                                                    | 0.466                                  |
| 1500          | 0.984                                                   | 0.095                                  | 0.972                                                   | 0.283                                  | 0.965                                                    | 0.468                                  |

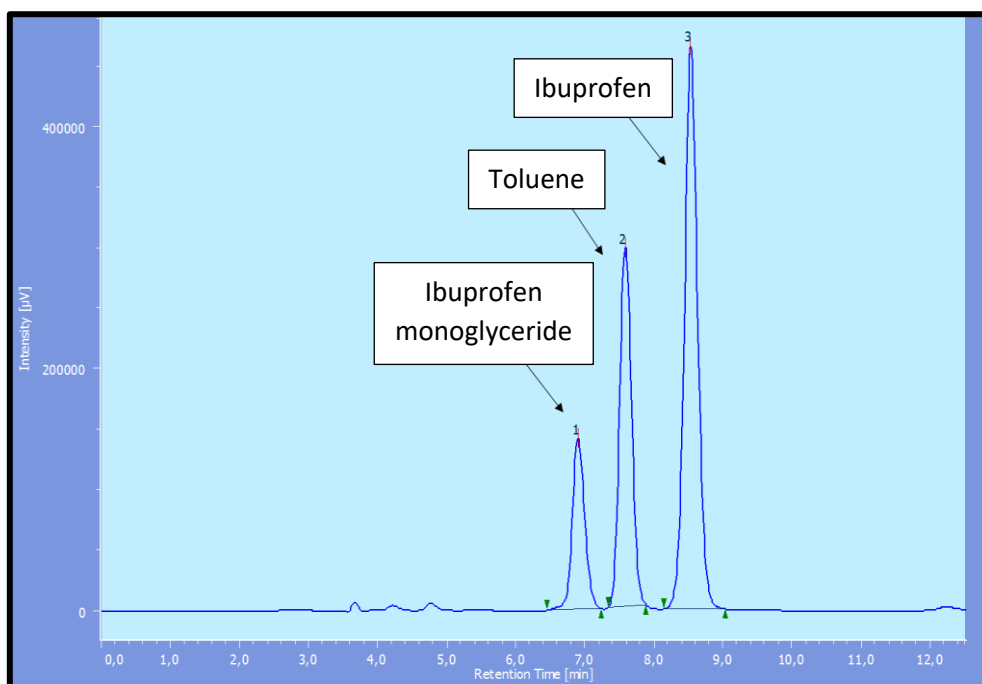

**Figure S1.** Type chromatogram of a catalyzed esterification of glycerol and ibuprofen in triphasic systems with toluene as cosolvent.  
Example conditions:  $C_{I0}=60 \text{ g}\cdot\text{L}^{-1}$ ,  $T=70 \text{ }^{\circ}\text{C}$ ,  $t=30 \text{ min}$ .
